# Supplementary material for: Driving Oscillatory Activity in the Human Cortex Enhances Motor Performance
Source: PubMed Central journal article supplement (PMC3343257; doi:10.1016/j.cub.2012.01.024), 2012-03-06
Supplement: mmc1.pdf [file mmc1.pdf]

**Current Biology, Volume 22**

## **Supplemental Information**

### **Driving Oscillatory Activity**

#### **in the Human Cortex**

#### **Enhances Motor Performance**

**Raed A. Joundi, Ned Jenkinson, John-Stuart Brittain, Tipu Z. Aziz, and Peter Brown**

### **Supplemental Inventory**

#### **1. Supplemental Figures and Tables**

Figure S1, related to Figure 3C

Figure S2, related to Figures 2A and 3A

Table S1, related to Results

Table S2, related to Results

Table S3, related to Results and Figure 3C

Table S4, related to Results

Table S5, related to Results

#### **2. Supplemental Experimental Procedures**

#### **3. Supplemental Analysis**

#### **4. Supplemental Results**

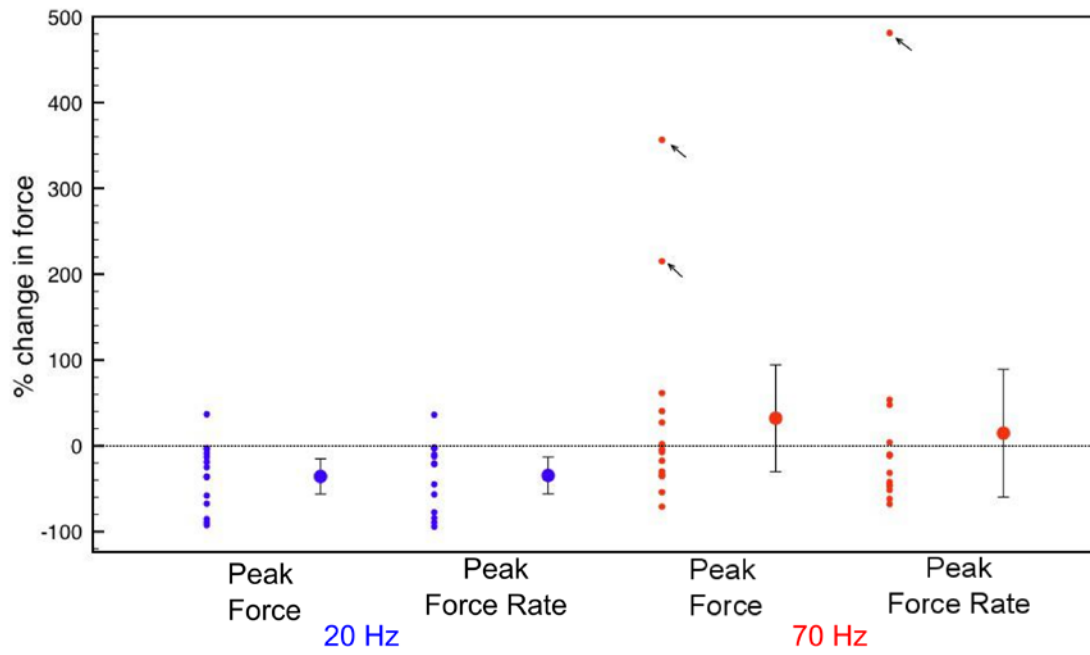

**Figure S1. No-Go % Change with Outliers Included, Related to Figure 3C**

Individual % changes are shown for 20 Hz (blue) and 70 Hz (red) for peak force and peak rate along with means  $\pm 2$  SEM. Outliers are identified with arrows.

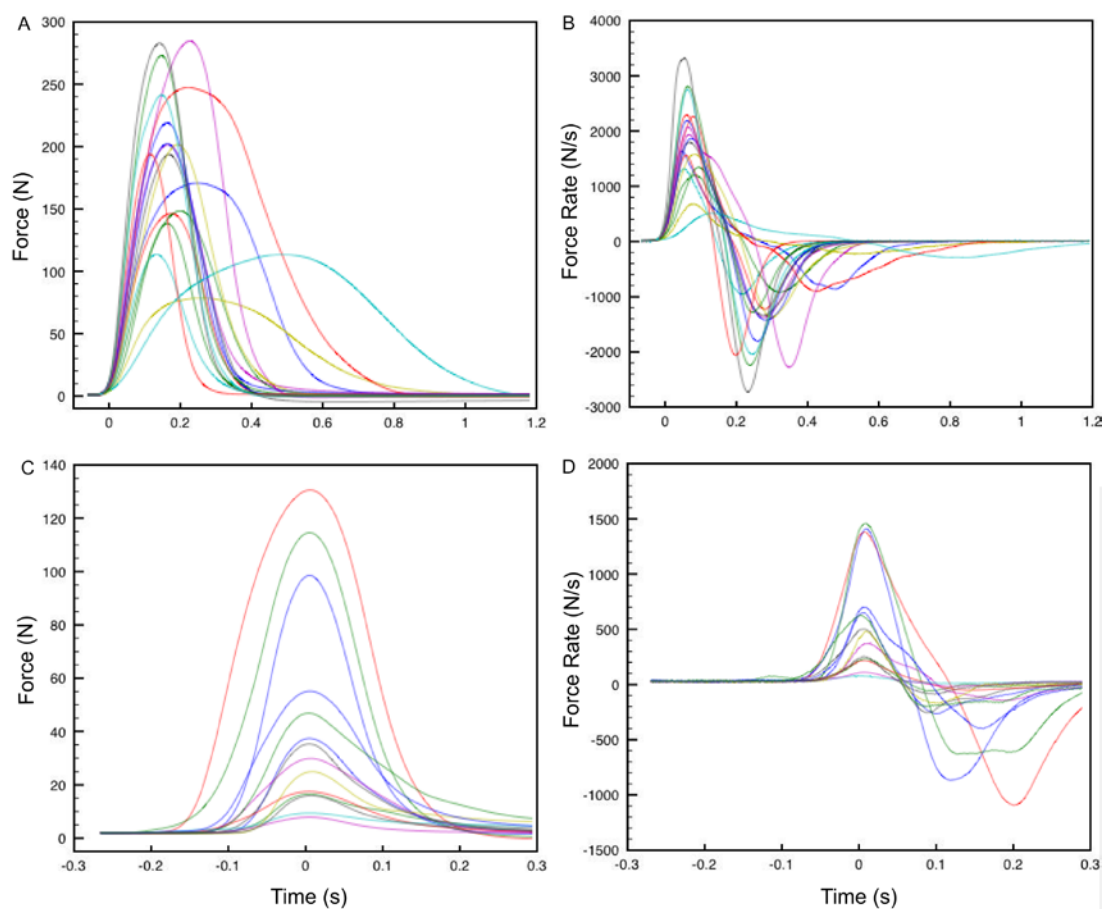

**Figure S2. Individual Subject Averages during No-Stimulation, Related to Figure 2A and Figure 3A**

Average traces per subject during no-stimulation trials in the 20 Hz session, shown for (A) go force aligned to onset, (B) go force rate aligned to onset, (C) no-go force aligned to peak, and (D) no-go force rate aligned to peak. Subjects are color matched across panels.

**Table S1. Nonsignificant Differences for Go Trials, Related to Results**

| Condition                                       | No Stimulation<br>(mean $\pm$ SEM) | Stimulation      | Significance<br>(paired t-test) |
|-------------------------------------------------|------------------------------------|------------------|---------------------------------|
| <b>Go reaction time</b>                         |                                    |                  |                                 |
| 20 Hz                                           | 271 $\pm$ 7.1 ms                   | 268 $\pm$ 8.3 ms | P=0.373                         |
| 70 Hz                                           | 266 $\pm$ 11 ms                    | 262 $\pm$ 8.4 ms | P=0.416                         |
| <b>Go Peak force</b>                            |                                    |                  |                                 |
| 20 Hz                                           | 200 $\pm$ 15 N                     | 199 $\pm$ 15 N   | P = 0.198                       |
| 70 Hz                                           | 206 $\pm$ 17 N                     | 207 $\pm$ 17 N   | P = 0.546                       |
| <b>Percentage go trials rejected</b>            |                                    |                  |                                 |
| 20 Hz                                           | 6.5 $\pm$ 1.5                      | 7.4 $\pm$ 1.7    | P=0.511                         |
| 70 Hz                                           | 5.8 $\pm$ 0.9                      | 6.1 $\pm$ 1.0    | P=0.705                         |
| <b>Force between fixation cross and pre-cue</b> |                                    |                  |                                 |
| 20 Hz                                           | 9.3 $\pm$ 6.4 N                    | 9.4 $\pm$ 6.4 N  | P=0.319                         |
| 70 Hz                                           | 10.0 $\pm$ 6.2 N                   | 10.1 $\pm$ 6.2 N | P=0.655                         |
| <b>Force between pre-cue and response</b>       |                                    |                  |                                 |
| 20 Hz                                           | 9.3 $\pm$ 6.4 N                    | 9.4 $\pm$ 6.4 N  | P=0.311                         |
| 70 Hz                                           | 10.0 $\pm$ 6.2 N                   | 10.1 $\pm$ 6.2 N | P=0.580                         |

**Table S2. Percentage of Errors of Commission and Total Number of No-Go Trials per Stimulation Frequency, Related to Results**

| Condition                                            | No Stimulation  | Stimulation     | Significance (paired t-test) |
|------------------------------------------------------|-----------------|-----------------|------------------------------|
| <b>Percentage relative to total number of trials</b> |                 |                 |                              |
| 20 Hz                                                | 44.5% $\pm$ 6.1 | 41.6% $\pm$ 7.0 | P=0.336                      |
| 70 Hz                                                | 45.3% $\pm$ 5.3 | 45.0% $\pm$ 5.5 | P=0.947                      |
| <b>Absolute number of trials</b>                     |                 |                 |                              |
| 20 Hz                                                | 13.3 $\pm$ 1.7  | 12.8 $\pm$ 1.7  | P=0.758                      |
| 70 Hz                                                | 13.0 $\pm$ 1.4  | 12.6 $\pm$ 1.5  | P=0.664                      |

**Table S3. Related to Results and Figure 3C**

70 Hz no-go trials, outliers removed. Gamma stimulation remains insignificant.

| Parameter  | % change         | Significance |
|------------|------------------|--------------|
| Peak Force | -10.1 $\pm$ 11.2 | P=0.386      |
| Peak Rate  | -21.0 $\pm$ 11.1 | P=0.072      |

**Table S4. Related to Results**

Significant differences between 20 Hz and 70 Hz stimulation. Go and no-go trials were different for all parameters.

|                  | Significance<br>(paired t-test) |
|------------------|---------------------------------|
| <b>GO</b>        |                                 |
| Initial velocity | P<0.001                         |
| Peak velocity    | P<0.001                         |
| Time to peak     | P=0.0037                        |
| <b>NO-GO</b>     |                                 |
| Peak force       | P = 0.0193                      |
| Peak velocity    | P = 0.0212                      |

**Table S5. Nonsignificant Correlations, Related to Results**

There was no correlation between percent changes during 20 Hz and 70 Hz stimulation, or between intensity of stimulation and performance.

| Parameter 1                                                 | Parameter 2                      | r value | Significance |
|-------------------------------------------------------------|----------------------------------|---------|--------------|
| <b>% change for 20 Hz and 70 Hz stimulation</b>             |                                  |         |              |
| Go trial initial rate with 20 Hz                            | Go trial initial rate with 70 Hz | -0.0356 | P = 0.889    |
| Go trial peak rate with 20 Hz                               | Go trial peak rate with 70 Hz    | 0.2359  | P=0.346      |
| <b>Intensity of stimulation and % change in performance</b> |                                  |         |              |
| Intensity of Stimulation                                    | Go initial rate with 20 Hz       | 0.0851  | P=0.763      |
| Intensity of Stimulation                                    | Go peak rate with 20 Hz          | 0.0929  | P=0.742      |
| Intensity of Stimulation                                    | Go initial rate with 70 Hz       | -0.2125 | P=0.447      |
| Intensity of Stimulation                                    | Go peak rate with 70 Hz          | -0.1075 | P=0.703      |
| Intensity of Stimulation                                    | Go peak force with 20 Hz         | -0.2917 | P=0.291      |
| Intensity of Stimulation                                    | Go peak force with 70 Hz         | 0.2987  | P=0.280      |
| Intensity of Stimulation                                    | Nogo peak force with 20 Hz       | 0.1073  | P=0.727      |
| Intensity of Stimulation                                    | Nogo peak rate with 20 Hz        | 0.0846  | P=0.783      |
| Intensity of Stimulation                                    | No-go peak force with 70 Hz      | -0.2589 | P=0.442      |
| Intensity of Stimulation                                    | No-go peak rate with 70 Hz       | -0.2405 | P=0.476      |

## Supplemental Experimental Procedures

During the first session, the subject's phosphene or scalp sensation threshold (whichever was lowest) to 20 Hz stimulation was determined, and an amplitude 50  $\mu\text{A}$  below this was selected for subsequent testing stimulation. Impedance during all stimulation sessions was always kept below 15  $\text{m}\Omega$ . Sub-threshold stimulation was confirmed by a forced-choice task comprising of 20 rounds of stimulation. One subject was always aware when stimulation was being applied and was therefore excluded from the study. A further two subjects experienced scalp sensations or phosphenes when stimulated at the selected intensity in the second session and so the intensity in the second session was lowered by a further 100 $\mu\text{A}$ . There was no significant difference between the mean stimulus amplitude of the two sessions ( $903 \pm 111 \mu\text{A}$  for beta and  $915 \pm 98 \mu\text{A}$  for gamma stimulation,  $t_{[17]}=-0.128$ ,  $p=0.901$ , paired t-test).

To assess the subject's perception of the stimulation, we employed a force-choice test prior to the experiment in which the subjects would attend to the task cues but instead of making a motor response they would indicate whether or not they thought the stimulation was active each time a response cue was presented (either red or green). The stimulation setting (ON or OFF) and their response (ON or OFF) was recorded for 20 trials. We then coded correct responses as 1 and incorrect responses as 0 and performed a binomial test on each dataset. The p value was always insignificant and ranged from 0.2 to 1, with the exception of one case which was 0.077. This confirmed that subjects were not aware of any active stimulation during the task.

## Supplemental Analysis

For no-go trials, we sought to analyze all trials in which some erroneous force response (ie 'twitch') had been produced. To do this we calculated the standard deviation of the baseline period, and rejected any trial in which the peak force was below 5 times this standard deviation. This allowed us to include all trials in which a small deviation from baseline occurred, but reject trials in which there was no response whatsoever. In most go/no-go experiments, the response is defined by an 'all-or-none' behavior, such as a button push, thus giving rise to a fairly low error rate, as compared with ours (mean 45%). Here, we were most interested in capturing the changes in force performance due to stimulation, and thus designated a low cutoff. We subsequently aligned trials to peak force and peak force rate, as in go trials.'

## Supplemental Results

The percentage change with gamma stimulation was significantly greater with respect to the initial rate of force development than peak velocity ( $t_{[17]}=3.39$ ,  $p=0.0035$ ), but not so for beta stimulation ( $t_{[17]}=1.08$ ,  $p=0.297$ ).

Due to the faster development of force with gamma stimulation there was a  $3.65 \pm 0.86 \%$  reduction in the time to achieve peak rate compared to no-stimulation ( $t_{[17]} = -4.25$ ,  $p = 0.00053$ ; drop from  $81.3 \pm 4.9 \text{ ms}$  to  $78.1 \pm 4.3 \text{ ms}$ ,  $t_{[17]} = 3.69$ ,  $p = 0.0018$ ). No such change was apparent for beta stimulation ( $0.84 \pm 0.63 \%$ ,  $t_{[17]} = 1.327$ ,  $p = 0.202$ ). There were significant differences in initial and peak rate when comparing beta and gamma stimulation, confirming a differential effect between the two interventions (Table S4). The independence of the effects of the two stimulation frequencies was suggested by the lack of any across-subject correlation in either initial or peak rate percentage change between beta and gamma stimulation (Table S5). In addition, there was no correlation between intensity of stimulation and any behavioral change (Table S5). Finally, there were no differences in grip force levels before the response cue was presented, regardless of the ongoing stimulation at 20 Hz or 70 Hz. The lack of modulation in baseline resting force suggests that stimulation per se did not simply alter the resting level of muscle activity (Table S1).
